## CORRECTION

# To boldly gulp: standard metabolic rate and boldness have context-dependent influences on risk-taking to breathe air in a catfish

**David J. McKenzie, Thiago C. Belaõ, Shaun S. Killen and F. Tadeu Rantin**

There is a Correction to *J. Exp. Biol.* **218**, 3762-3770.

The article was originally published under a Company of Biologists Publication Agreement. The authors subsequently selected Open Access publication and the article is now published under a CC-BY license. The article has also been deposited in PubMed Central for immediate release.

The online article and PDF have been amended to reflect the change in licensing.
